# Supplementary material
Source: PubMed Central journal article supplement (PMC2585038)
Supplement: NIHMS77688-supplement-SuppInfo.pdf [file NIHMS77688-supplement-SuppInfo.pdf]

## Assembly of Dithiocarbamate-Anchored Monolayers on Gold Surfaces in Aqueous Solutions: Supporting Information

|                                                                        |     |
|------------------------------------------------------------------------|-----|
| Table of Contents .....                                                | S-1 |
| UV absorption analysis of <i>in situ</i> DTC formation .....           | S-2 |
| SHG data of DTC and EG6-SH chemisorption to oxidized Au surfaces ..... | S-4 |
| Monolayer (ML) estimation based on XPS data.....                       | S-6 |
| XPS spectra of bis-HE-DTC, ME-DTC, and P10LRR-DTC on Au.....           | S-7 |

**UV absorption spectra of ME-DTC, formed *in situ* in deaerated MeOH (25.7 mM, with 2 equiv. ME) and diluted with deionized water (pH 6) after 30 min.**

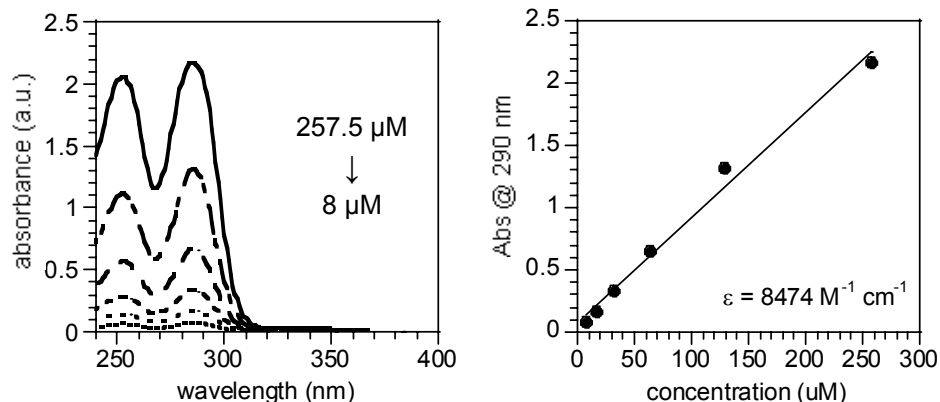

**UV absorption spectra of Pro-DTC, formed *in situ* in deaerated MeOH (25 mM, with 2 equiv. Pro) and diluted with deionized water (pH 10) after 30 min.**

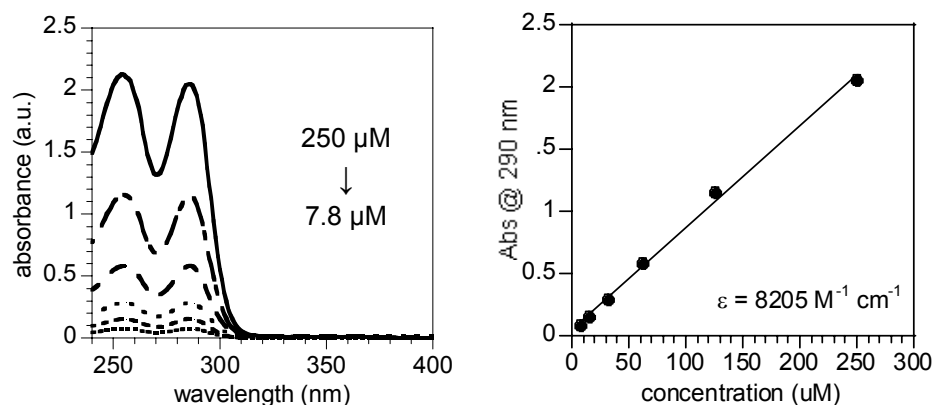

**UV absorption spectra of bis-EG6-DTC, formed *in situ* in deaerated DMF (10.7 mM, with 2 equiv. bis-EG6 amine) and diluted with deionized water (pH 10) after 30 min.**

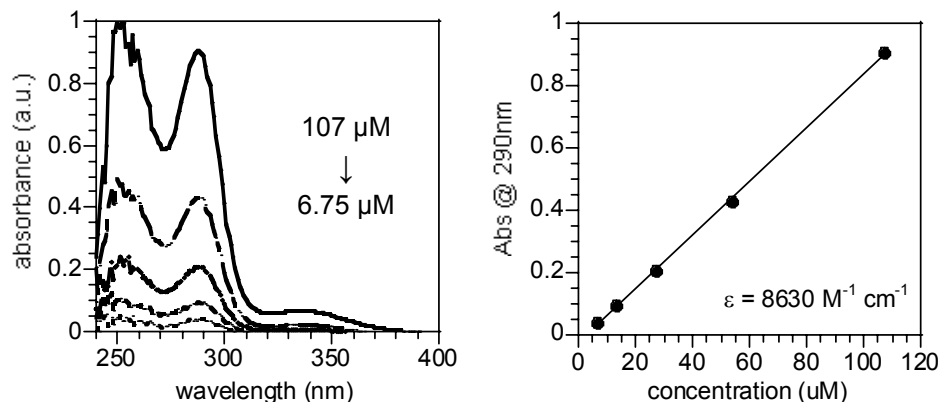

**Stability of bis-EG6-DTC (125 mM) to air oxidation (pH 6 and pH 10).**

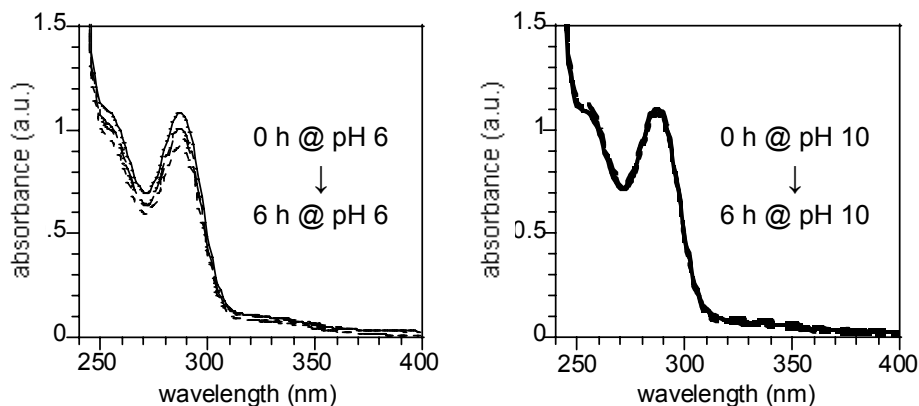

**UV absorption spectra of P6R-DTC, formed *in situ* in MeOH (8 mM, with 3 equiv. CS<sub>2</sub> and 1 equiv. Et<sub>3</sub>N) and diluted with deionized water (pH 6) to 250 μM after 30 min.**

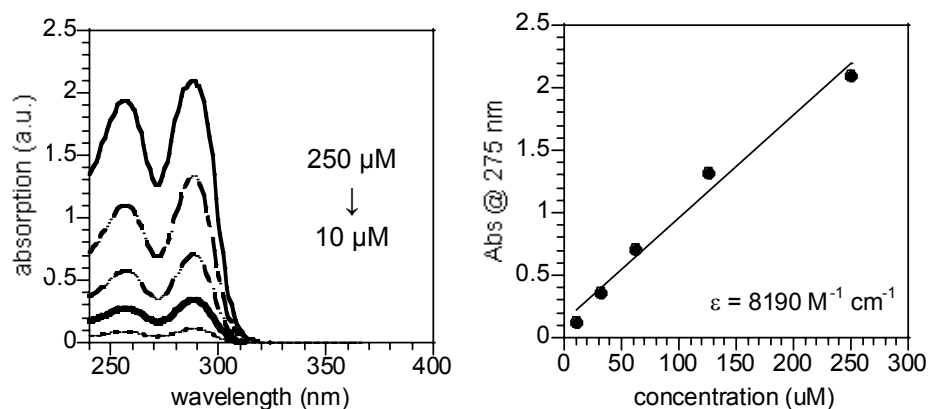

*In situ* DTC formation was complete after 30 min, by comparison with Pro-DTC.

**UV absorption spectra of P10LRR-DTC, formed *in situ* in MeOH (4 mM, with 3 equiv. CS<sub>2</sub> and 1 equiv. Et<sub>3</sub>N), then diluted with water (pH 6) to 250 μM after 30 min.**

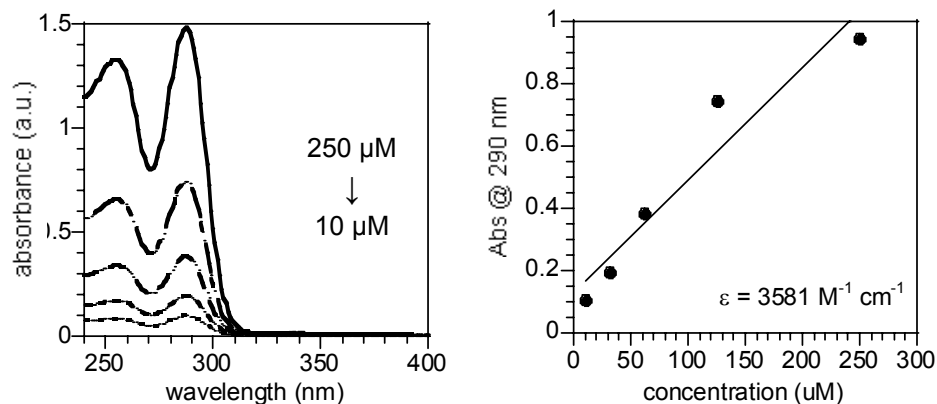

Aqueous solution of P10LRR (250 μM) and CS<sub>2</sub> (3 eq) monitored at RT, prior to serial dilution. Low  $\epsilon$  value reveals DTC formation was incomplete after 24 h.

### SHG analysis of bis-EG6-DTC adsorption, on freshly cleaned Au surface

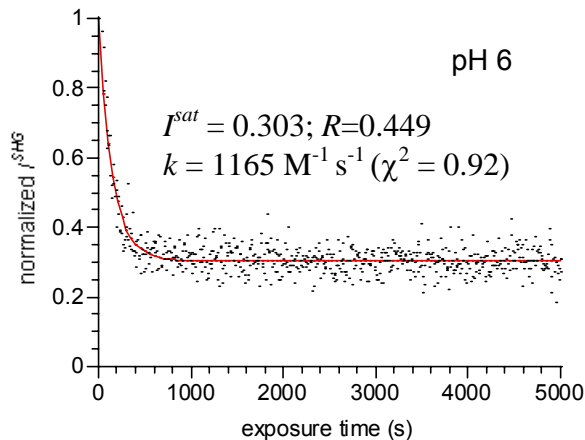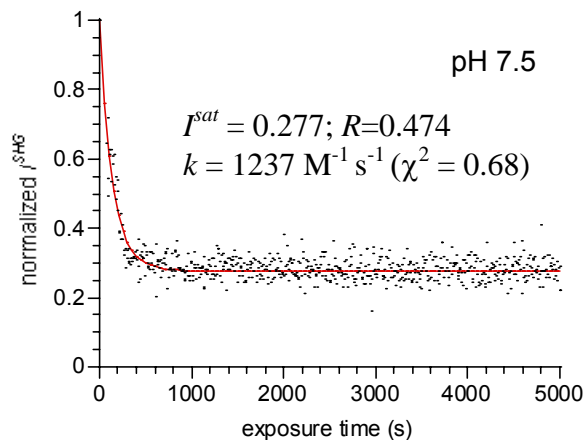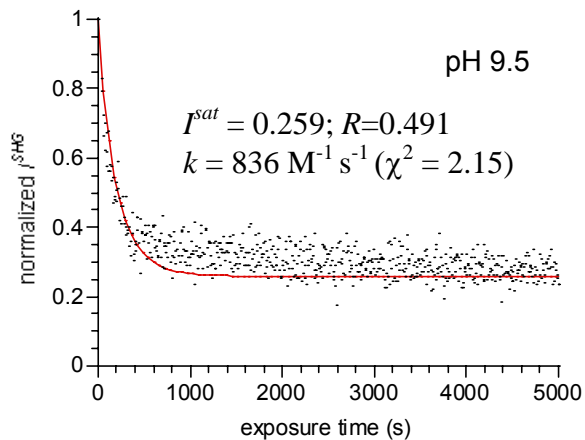

### SHG analysis of EG6-SH adsorption

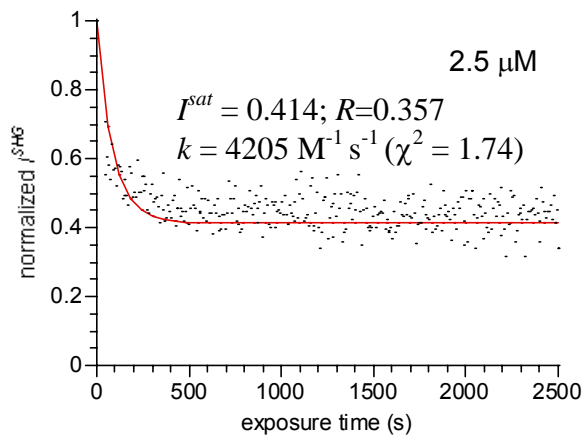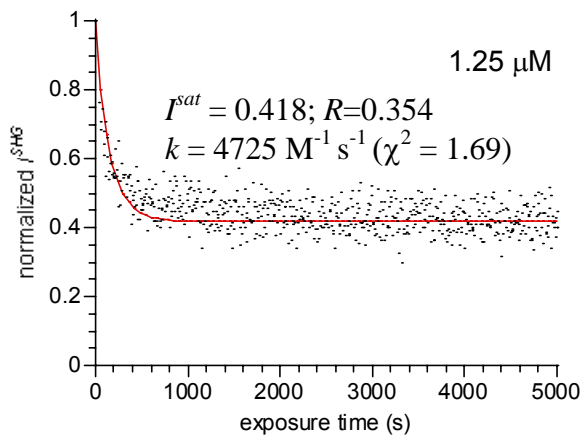

### SHG analysis of P10LRR-DTC adsorption (with coadsorption of byproduct)

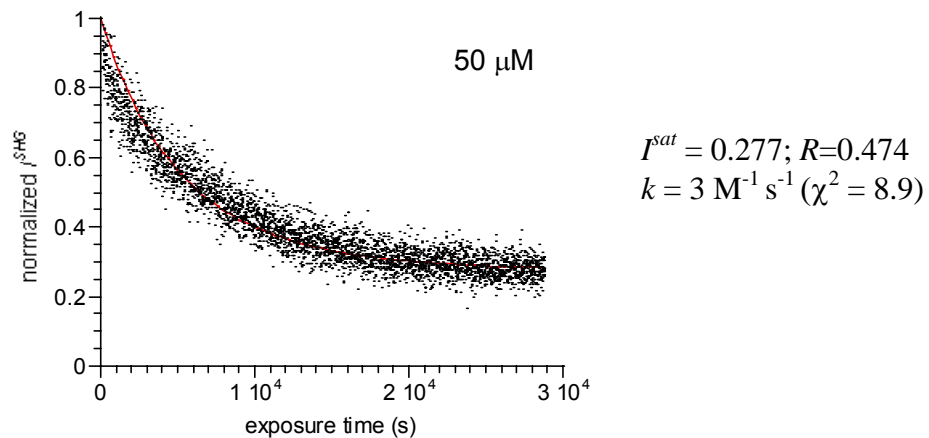

### SHG analysis of ME-DTC adsorption (with coadsorption of byproduct)

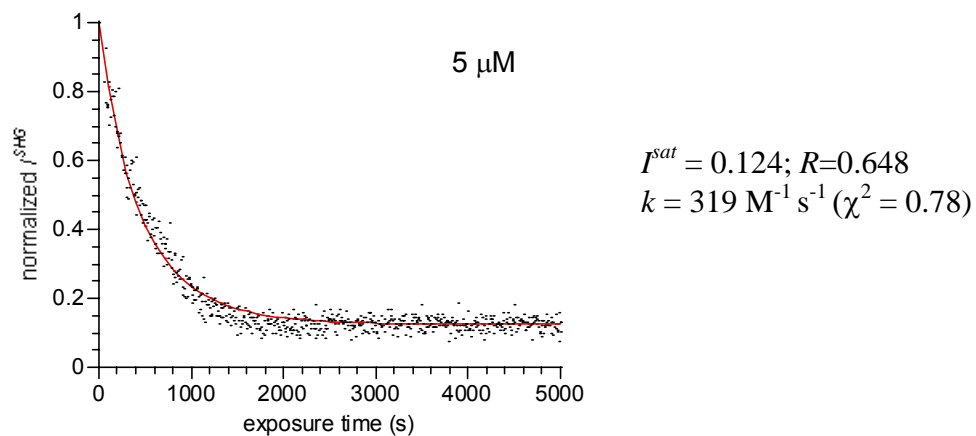

**Monolayer (ML) estimation of DAMs on Au by XPS.** In Ref. 40, Fadley proposed (under the assumption of a non-attenuating adlayer) that the ratio of overlayer-to-substrate signal intensity can be described as

$$\frac{N_l(\theta_{ph})}{N_k(\theta_{ph})} = \frac{\Omega_0(E_l) \times A_0(E_l) \times D_0(E_l) \times \frac{d\sigma_l}{d\Omega} \times d}{\Omega_0(E_k) \times A_0(E_k) \times D_0(E_k) \times \frac{d\sigma_k}{d\Omega} \times \Lambda_e^{subst}(E_k) \cos \theta_{ph}} \times \left( \frac{s_{overl}}{s_{subst}} \right) \quad (S1)$$

where  $N_l(\theta_{ph})$  and  $N_k(\theta_{ph})$  are the peak intensities of the overlayer and substrate (i.e. N 1s or S 2p and Au 4f, respectively),  $\Omega_0$  is the acceptance solid angle of the electron analyzer,  $A_0$  the effective area of specimen over which  $\Omega_0 \neq 0$ ,  $D_0$  is the instrument detection efficiency,  $\theta_{ph}$  is the photoemission angle between surface normal and electron emission direction,  $d\sigma_k/d\Omega$  is differential cross-section, which can be calculated using tabulated Scofield cross-sections and the Reilman asymmetric parameter,  $\Lambda_e^{subst}(E_k)$  is the inelastic mean free pass (IMFP) of the substrate photoelectron in the substrate,  $s_{overl}$  is the mean surface density of atoms in which peak  $l$  originates in  $\text{cm}^{-2}$ ,  $s_{subst}$  is the mean surface density of substrate atoms in  $\text{cm}^{-2}$ ,  $s_{overl}/s_{subst}$  is the fractional monolayer coverage of the atomic species in which peak  $l$  originates, and  $d$  is the mean separation between layers of density  $s$  in the substrate.

The short HE chains allow the Au 4f signal intensities to be measured with minimal extinction, and permit a straight application of the non-attenuating adlayer approximation to determine adlayer coverage in terms of ML, i.e. the ratio of adatoms to surface Au atoms. For simplicity, the surface was assumed to be equivalent to a Au(111) plane. Eq. S1 can then be modified so that the adlayer coverage (based on the S 2p peak) can be defined as:

$$\theta = \frac{N_{S_{2p}}}{N_{Au_{4f}}} \frac{\frac{d\sigma_{Au_{4f}}}{d\Omega} \times \Lambda_e^{Au}(KE_{Au_{4f}}) \cos \theta_{ph}}{\frac{d\sigma_{S_{2p}}}{d\Omega} \times d} \quad (S2)$$

where  $N_{S_{2p}}$  and  $N_{Au_{4f}}$  are the intensities of the S 2p and Au 4f peaks respectively,  $\Lambda_e^{Au}(KE_{Au_{4f}})$  is the IMFP of the Au 4f photoelectron in bulk Au (15.78 Å), and  $d$  is the lattice spacing between Au(111) planes (1.29 Å). The N 1s peak intensity can be used to calculate ML coverage in a similar fashion.

## XPS spectra of DAMs on Au

All spectra were acquired using monochromatic Al K $\alpha$  radiation (1486.58 eV) at photoemission (PE) angles of 0° and 60°, with an acquisition time of 4.8 s for N and S, or 0.4 s for Au.

### Bis-HE-DTC on Au:

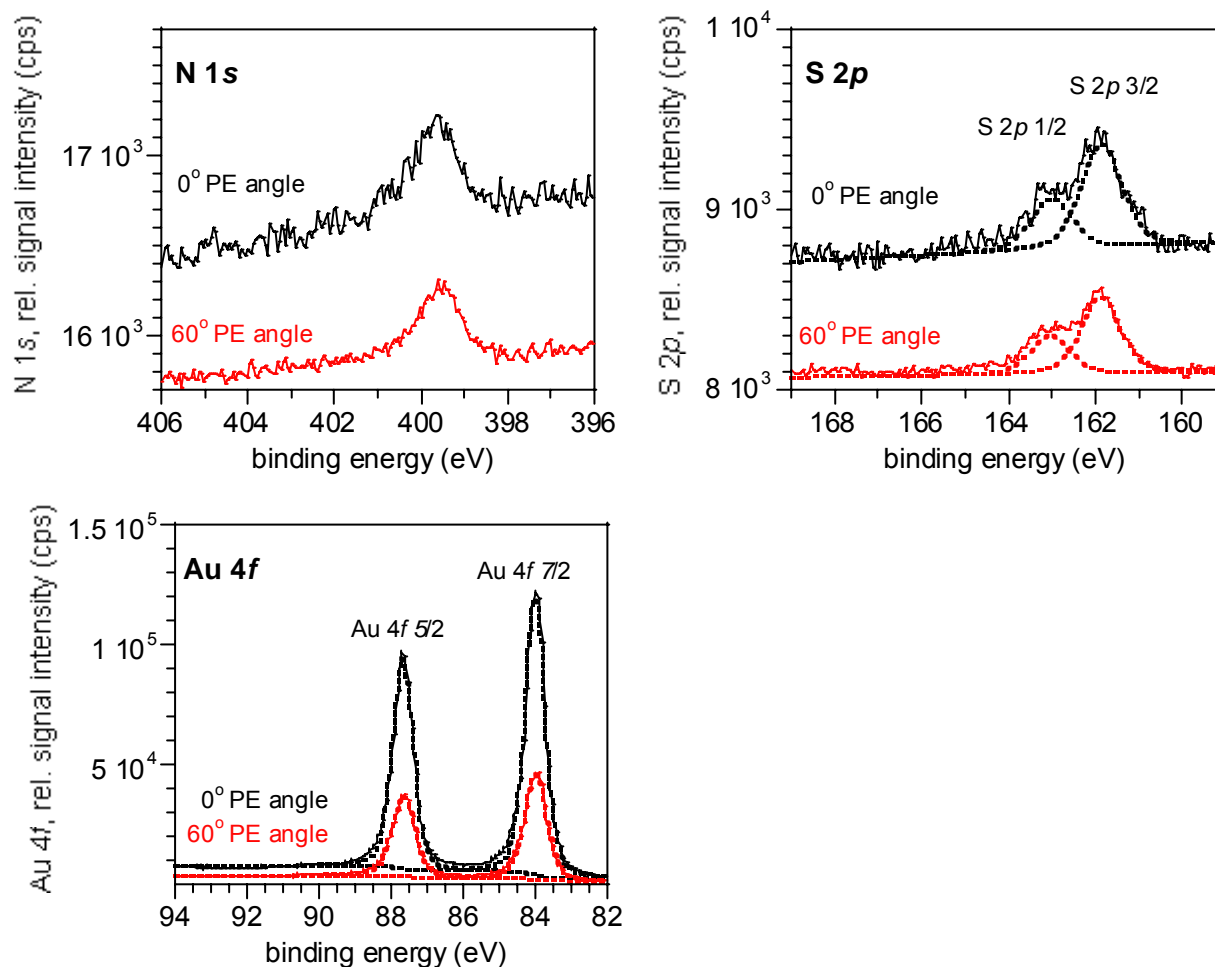

|     | area (%) |      |       |      |       | ML   |      |
|-----|----------|------|-------|------|-------|------|------|
|     | N 1s     | S 2p | Au 4f | S/N* | S/Au  | N    | S    |
| 0°  | 1.42     | 2.97 | 38.74 | 2.09 | 0.077 | 0.44 | 0.46 |
| 60° | 2.32     | 4.37 | 28.64 | 1.88 | 0.153 | 0.48 | 0.43 |

\*theor. value = 2.0

**ME-DTC on Au:**

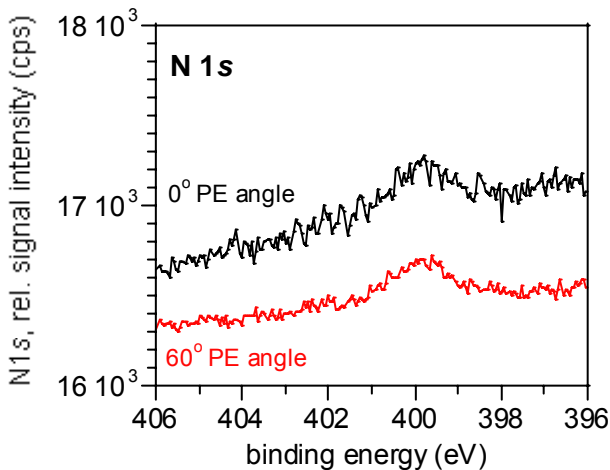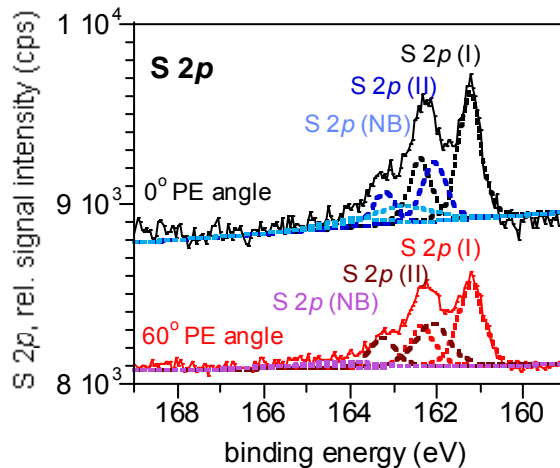

| area (%) | N 1s | S 2p | Au 4f | S/N* | S/Au  |
|----------|------|------|-------|------|-------|
| 0°       | 1.20 | 4.35 | 55.00 | 3.62 | 0.079 |
| 60°      | 1.61 | 5.26 | 34.66 | 3.26 | 0.152 |

| ML  | N    | S    |
|-----|------|------|
| 0°  | 0.26 | 0.52 |
| 60° | 0.28 | 0.45 |

\*theor. value = 2.0

**P10LRR-DTC on Au:**

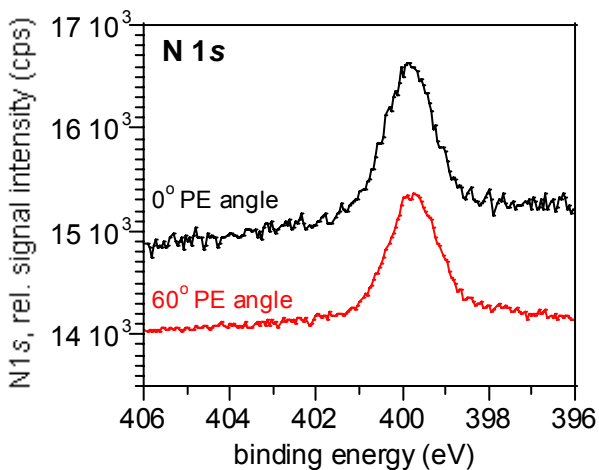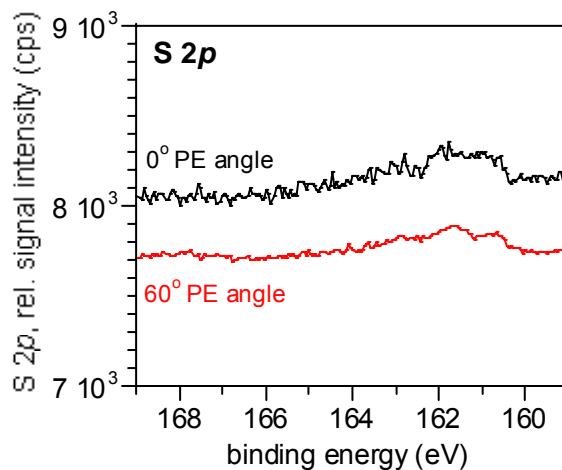

| area (%) | N 1s | S 2p | Au 4f | S/N* | S/Au  |
|----------|------|------|-------|------|-------|
| 0°       | 7.3  | 1.3  | 40.8  | 0.18 | 0.032 |
| 60°      | 8.6  | 2.0  | 25.0  | 0.23 | 0.080 |

| ML  | N    | S    |
|-----|------|------|
| 0°  | 0.07 | 0.19 |
| 60° | 0.07 | 0.24 |

\*theor. value = 0.13
